# Supplementary material
Source: HighWire-hosted journal article supplement (https://erj.ersjournals.com/content/49/4/1600711)
Supplement: inline-supplementary-material-1 [file inline-supplementary-material-1.pdf]

## SUPPLEMENTARY MATERIAL

### Methods

Prior to iron dilution preparations, a stock solution of 10mM FeSO<sub>4</sub> and 1mM sodium ascorbate was made in 50ml distilled water by adding 76mg of FeSO<sub>4</sub> (Sigma-Aldrich, USA) and 9mg of sodium ascorbate (Sigma-Aldrich, USA). The sodium ascorbate is a vital component of the mixture as this prevents oxidation of iron in solution keeping it in its ferrous (Fe<sup>2+</sup>) state. A further stock solution of 10mM FeSO<sub>4</sub> was prepared without the addition of sodium ascorbate in order to allow oxidation of iron in solution to its oxidised ferric (Fe<sup>3+</sup>) state. Both of these stock solutions were then filter sterilised and stored at 4°C. A fresh batch of stock solutions was prepared prior to each set of experiments. All experiments utilising Fe<sup>3+</sup> were run using the same concentration of iron as the experiments using Fe<sup>2+</sup>. Methods for PCR, proliferation and other assays were as described in the main manuscript. All Fe<sup>3+</sup> experiments were run in triplicate on 3 separate occasions, using A549 and QG56 cells; since none of the functional assays were affected by Fe<sup>2+</sup> in PBECS we restricted the assessment of Fe<sup>3+</sup> to the cancer lines, where an effect on proliferation had been seen.

### Results

The oxidized Fe<sup>3+</sup> solution resulted in a small rise in ferrozine (p=0.06 both lines) and expression of ferritin on PCR in QG56 cells (fold change 1.2) albeit not reaching statistical significance. No change in gene expression was seen for *IREB2* or *TFRC* (all p>0.05). On Western blotting a rise in ferritin was seen in both cell lines, similar to that observed with Fe<sup>2+</sup> (Figure 1, main manuscript and supplementary figure 1), and significantly elevated above untreated cells (p<0.01). However, cells did not proliferate significantly in the presence of Fe<sup>3+</sup> (supplementary figure 2), indeed there was a

reduction in proliferation seen. Apoptosis was elevated in the presence of  $\text{Fe}^{3+}$ , at a level similar to the incubations with  $\text{Fe}^{2+}$  (mean 22 and 26% cells positive; A549 and QG56 respectively), albeit not significantly different from untreated cells. Necrosis occurred in 5% of A549 and QG56 cells; again this was no different from untreated cells ( $p>0.8$ ). Migration in the scratch wound assay also showed no significant difference in either cell line ( $p>0.4$ ).
