# Supplementary material
Source: HighWire-hosted journal article supplement (https://erj.ersjournals.com/content/49/4/1600711)
Supplement: inline-supplementary-material-2 [file inline-supplementary-material-2.pdf]

## SUPPLEMENTARY MATERIAL

### Methods

TaqMan gene expression assays assessed expression of *DMT1* and *HIF1a* which code for proteins involved in iron homeostasis (divalent metal transporter 1 and hypoxia inducible factor 1 alpha subunit). RNA was isolated using Trizol, converted to cDNA using RNA polymerase III, and used with appropriate housekeeping genes in triplicate real time PCR experiments (all reagents Fisher Scientific, Loughborough, UK). Results are presented as relative gene expression in the table below, using the comparative  $C_T$  method.

### Results

| Cell type            | DMT1 expression ( $2^{-\Delta\Delta C_t}$ ) | HIF1a expression ( $2^{-\Delta\Delta C_t}$ ) |
|----------------------|---------------------------------------------|----------------------------------------------|
| Wild type PBECs      | 0.00026                                     | 0.00074                                      |
| Wild type A549       | 6.52812                                     | 2.77663                                      |
| Wild type QG56       | 0.000001                                    | 0.0042                                       |
| IREB2 Knockdown A549 | 0.01391                                     | 0.00322                                      |
| IREB2 Knockdown QG56 | 115.76056                                   | 83.43033                                     |
