# Supplementary material
Source: HighWire-hosted journal article supplement (https://erj.ersjournals.com/content/49/4/1600711)
Supplement: inline-supplementary-material-3 [file inline-supplementary-material-3.pdf]

|                                  | <b>Spearman's</b> | <b>p value (2 tailed)</b> |
|----------------------------------|-------------------|---------------------------|
| Hb vs histology                  | 0.189             | 0.132                     |
| Hb vs smoking status             | 0.132             | 0.421                     |
| Hb vs pack year history          | -0.171            | 0.403                     |
|                                  |                   |                           |
| Ferritin vs histology            | -0.0295           | 0.018*                    |
| Ferritin vs smoking status       | 0.111             | 0.507                     |
| Ferritin vs pack year history    | -0.012            | 0.953                     |
|                                  |                   |                           |
| Iron vs histology                | 0.077             | 0.543                     |
| Iron vs smoking status           | -0.036            | 0.83                      |
| Iron vs pack year history        | -0.04             | 0.845                     |
|                                  |                   |                           |
| Transferrin vs histology         | -0.162            | 0.199                     |
| Transferrin vs smoking status    | -0.279            | 0.086                     |
| Transferrin vs pack year history | 0.155             | 0.449                     |

\* denotes  $p$  value < 0.05

Supplementary Table S1: Additional clinical analyses
