# Supplementary material
Source: HighWire-hosted journal article supplement (https://erj.ersjournals.com/content/49/4/1600711)
Supplement: inline-supplementary-material-6 [file inline-supplementary-material-6.pdf]

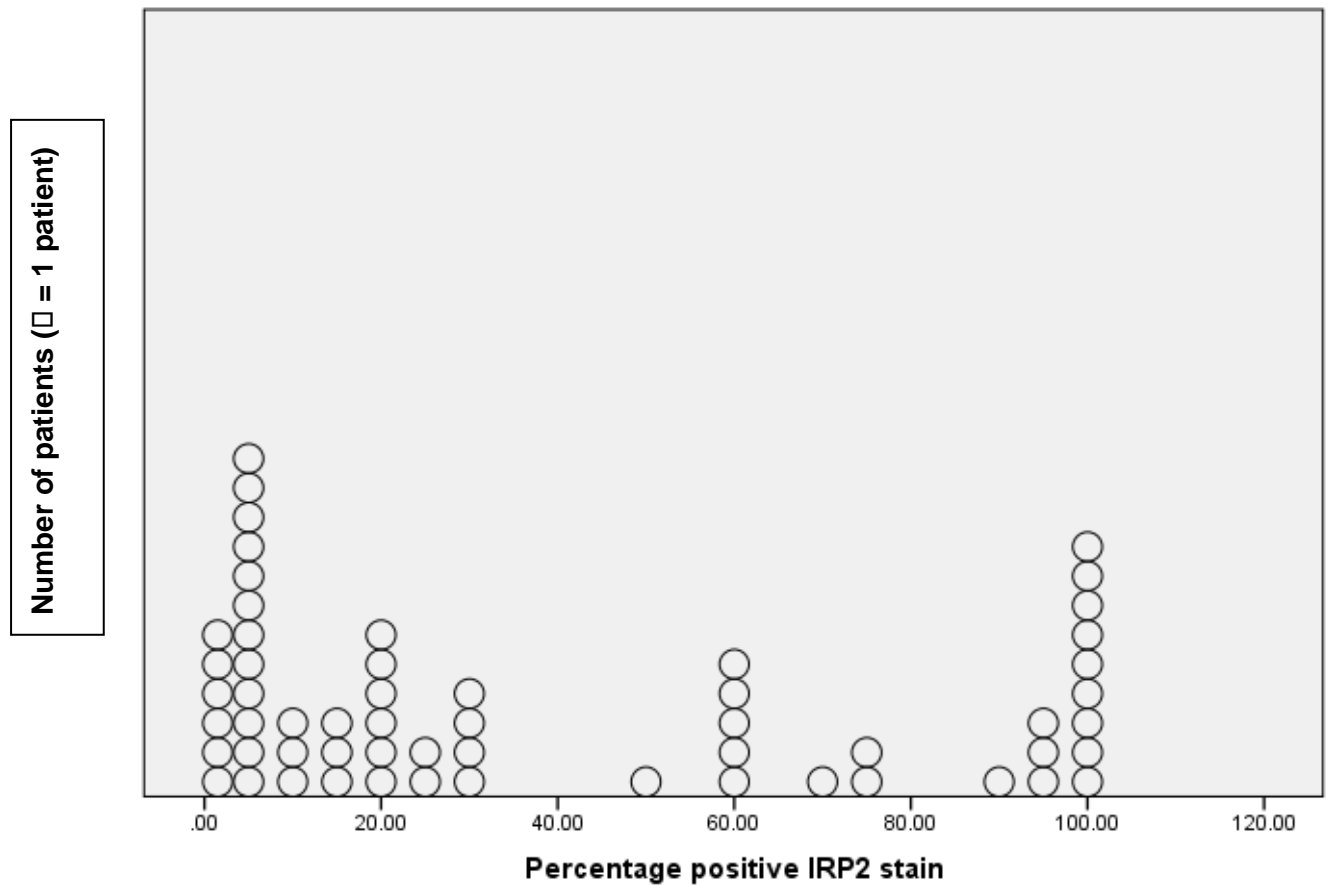

**Supplementary figure 3: IRP2 expression in each patient**

This chart shows the spread of IRP2 expression in our clinical cohort.
